# Supplementary material for: The modified frailty index and 30-day adverse events in oncologic neurosurgery
Source: Springer Nature journal article supplement (doi:10.1007/s11060-017-2644-0), 2017-11-14
Supplement: MOESM1 [file 15223640]

Table S1. Inclusion Criteria: Surgery and Pathology Categories1

| Surgery Category | CPT Procedure Codes |
| --- | --- |
| Supratentorial brain | 61510, 61545, 61546 |
| Supratentorial dural | 61512 |
| Infratentorial | 61518, 61519, 61520, 61521, 61526, 61530 |
| Transphenoidal | 61548, 62165 |
|  |  |
| Pathology Category | ICD-9 Diagnosis Codes |
| Primary brain malignant (or uncertain) | 191.x, 192.8, 192.9, 194.3, 194.4, 237.0, 237.1, 237.5, 239.6, 239.7 |
| Primary brain benign | 225.0, 225.8, 225.9, 227.3, 227.4, 228.00, 228.02 |
| Primary dural malignant (or uncertain) | 192.1, 237.6 |
| Primary dural benign | 213.0, 225.2 |
| Primary cranial nerve malignant or benign | 192.0, 225.1, 237.72, 237.73 |
| Secondary malignant | 198.3, 140.x, 141.x, 142.x, 143.x, 144.x, 145.x, 146.x, 147.x, 148.x, 149.x, 150.x, 151.x, 152.x, 153.x, 154.x, 155.x, 156.x, 156.x, 158.x, 159.x, 160.x, 161.x, 162.x, 163.x, 164.x, 165.x, 170.x, 171.x, 172.x, 173.x, 174.x, 175.x, 176.x, 179.x, 180.x, 181.x, 182.x, 183.x, 184.x, 185.x, 186.x, 187.x, 188.x, 189.x, 190.x, 192.2, 192.3, 193.x, 194.0, 194.1, 194.5, 194.6, 194.8, 194.9, 195.x, 196.x, 197.x, 198.x, 199.x, 200.x, 201.x, 202.x, 203.x, 204.x, 205.x, 206.x, 207.x, 208.x, 209.x, or NSQIP Code for “disseminated cancer” |

CPT – Current Procedural Terminology; ICD-9 – International Classification of Diseases, Ninth Revision; CN – cranial nerve; NSQIP – National Surgical Quality Improvement Program

1. Patients were included if they had both an appropriate CPT procedure code and ICD-9 diagnosis code corresponding to the listed surgery and pathology categories.
